# Supplementary material
Source: Springer Nature journal article supplement (https://www.springermedizin.de/resource/supplementary/12891_2009_772_MOESM2_ESM.pdf/9506922)

**Mean Pain Score**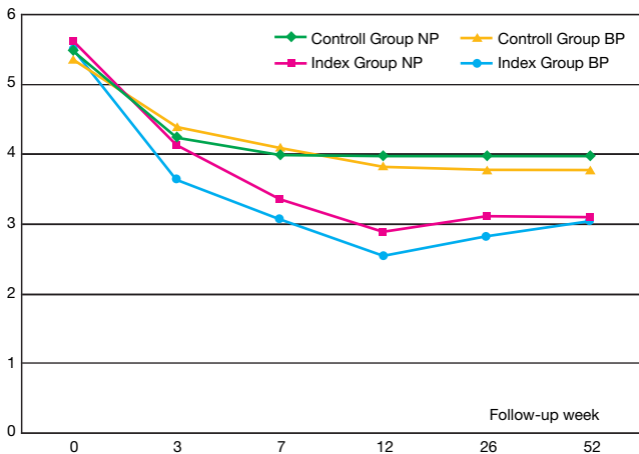**Mean Disability Score (CPQ)**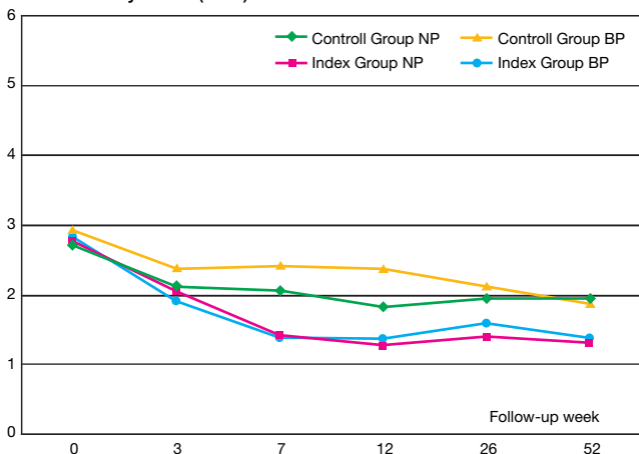**Mean Disability Score (WDQ)**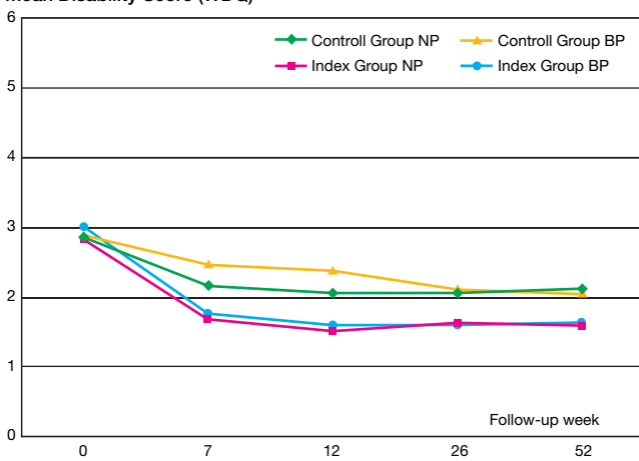

Supplement: MOESM2 [file 9506922]
